# Supplementary material for: Baseline IgM Amounts Can Identify Patients with Poor Outcomes: Results from a Real-Life Single-Center Study on Classical Hodgkin Lymphoma
Source: MDPI journal article supplement (doi:10.3390/cancers16040826), 2024-02-18

**Supplementary Table 1: clinical characteristics of patients included in the training and validation sets**

|                                                     | <b>All patients<br/>(n=212)</b> | <b>Training set<br/>(n=106)</b> | <b>Validation set<br/>(n=106)</b> | <b>p</b> |
|-----------------------------------------------------|---------------------------------|---------------------------------|-----------------------------------|----------|
| <b>Age &lt;45 years, n<br/>(%)</b>                  | 148<br>(69.8%)                  | 75<br>(63.3)                    | 73<br>(68.9)                      | 0.99     |
| <b>Gender male, n<br/>(%)</b>                       | 109<br>(51.4%)                  | 56<br>(52.8)                    | 53<br>(50%)                       | 0.99     |
| <b>Median WBC, cells/mm<sup>3</sup><br/>(range)</b> | 9.86<br>(1.12-26.00)            | 9.75<br>(1.12-25.80)            | 10.05<br>(2.20-26.00)             | 0.99     |
| <b>Median ANC, cells/mm<sup>3</sup><br/>(range)</b> | 7.24<br>(0.79-22.20)            | 7.07<br>(0.79-20.60)            | 7.29<br>(0.80-22.20)              | 0.99     |
| <b>Median ALC, cells/mm<sup>3</sup><br/>(range)</b> | 1.46<br>(0.19-3.95)             | 1.45<br>(0.19-3.95)             | 1.50<br>(0.19-3.56)               | 0.99     |
| <b>Median NLR, cells/mm<sup>3</sup><br/>(range)</b> | 4.79<br>(0.60-64.7)             | 4.81<br>(1.18-53.40)            | 4.73<br>(0.60-64.7)               | 0.99     |
| <b>Presence of large nodal mass, n<br/>(%)</b>      | 64<br>(30.2%)                   | 37<br>(34.9)                    | 27<br>(25.5)                      | 0.74     |
| <b>Presence of extranodal sites, n<br/>(%)</b>      | 53<br>(25.0%)                   | 26<br>(24.5)                    | 27<br>(25.5)                      | 0.96     |
| <b>IPS score ≥3, n<br/>(%)</b>                      | 54<br>(25.5%)                   | 26<br>(24.5)                    | 28<br>(26.4)                      | 0.92     |
| <b>IgM ≤50mg/dL, n<br/>(%)</b>                      | 49<br>(23.1%)                   | 23<br>(21.7)                    | 26<br>(24.5)                      | 0.86     |
| <b>Positive PET-2, n<br/>(%)</b>                    | 33<br>(15.6%)                   | 19<br>(17.9)                    | 14<br>(13.2)                      | 0.85     |

**Supplementary Table 2: univariate analysis of PFS in the training set**

| Clinical variable  | N  | 5-years PFS | p-value | HR   | 95% CI   |
|--------------------|----|-------------|---------|------|----------|
| Age                |    |             |         |      |          |
| ≤ 45 years         | 75 | 66.2%       | 0.65    | 0.8  | 0.4-1.8  |
| > 45 years         | 31 | 74.9%       |         |      |          |
| Gender             |    |             |         |      |          |
| Male               | 56 | 66.3%       | 0.9     | 0.99 | 0.5-1.9  |
| Female             | 50 | 65.1%       |         |      |          |
| WBC                |    |             |         |      |          |
| <15.000 cells u/L  | 88 | 71.6%       | 0.13    | 2.1  | 0.8-5.4  |
| ≥15.00 cells u/L   | 18 | 55.1%       |         |      |          |
| ALC                |    |             |         |      |          |
| <600 cells u/L     | 10 | 57.1%       | 0.54    | 1.4  | 0.5-4.8  |
| ≥600 cells u/L     | 96 | 69.7%       |         |      |          |
| Bulky disease      |    |             |         |      |          |
| Absent             | 69 | 71.6%       | 0.25    | 1.3  | 0.7-3.1  |
| Present            | 37 | 63.0%       |         |      |          |
| Extranodal disease |    |             |         |      |          |
| Absent             | 80 | 74.5%       | 0.03    | 2.7  | 1.2-6.4  |
| Present            | 26 | 50.2%       |         |      |          |
| IPS                |    |             |         |      |          |
| <3                 | 80 | 73.4%       | 0.01    | 2.9  | 1.3-7.1  |
| ≥3                 | 26 | 52.7%       |         |      |          |
| NLR                |    |             |         |      |          |
| <6                 | 63 | 81.3%       | 0.0001  | 4.4  | 2.1-9.1  |
| ≥6                 | 42 | 47.8%       |         |      |          |
| IgM                |    |             |         |      |          |
| ≤50 mg/dL          | 23 | 54.9%       | 0.02    | 2.8  | 1.2-6.6  |
| >50 mg/dL          | 83 | 72.5%       |         |      |          |
| PET2-status        |    |             |         |      |          |
| Negative           | 87 | 77.6%       | <0.0001 | 21.6 | 7.4-63.5 |
| Positive           | 19 | 26.2%       |         |      |          |

**Supplementary Table 3: univariate analysis of PFS in the validation set**

| Clinical variable  | N   | 5-years PFS | p-value | HR   | 95% CI   |
|--------------------|-----|-------------|---------|------|----------|
| Age                |     |             |         |      |          |
| ≤ 45 years         | 73  | 80.6        | 0.4     | 1.5  | 0.6-3.8  |
| > 45 years         | 33  | 72.9        |         |      |          |
| Gender             |     |             |         |      |          |
| Male               | 53  | 68.0        | 0.03    | 2.7  | 1.1-6.5  |
| Female             | 53  | 87.9        |         |      |          |
| WBC                |     |             |         |      |          |
| <15.000 cells u/L  | 90  | 81.5        | 0.01    | 5.4  | 1.4-20.9 |
| ≥15.00 cells u/L   | 16  | 60.6        |         |      |          |
| ALC                |     |             |         |      |          |
| <600 cells u/L     | 101 | 79.7        | 0.13    | 5.8  | 0.6-59.7 |
| ≥600 cells u/L     | 5   | 53.3        |         |      |          |
| Bulky disease      |     |             |         |      |          |
| Absent             | 79  | 83.0        | 0.04    | 2.8  | 1.0-7.6  |
| Present            | 27  | 65.0        |         |      |          |
| Extranodal disease |     |             |         |      |          |
| Absent             | 79  | 80.8        | 0.24    | 1.8  | 0.6-5.1  |
| Present            | 27  | 70.4        |         |      |          |
| IPS                |     |             |         |      |          |
| <3                 | 78  | 82.0        | 0.1     | 2.3  | 0.8-6.5  |
| ≥3                 | 28  | 67.1        |         |      |          |
| NLR                |     |             |         |      |          |
| <6                 | 64  | 78.2        | 0.94    | 1.0  | 0.4-2.5  |
| ≥6                 | 42  | 78.7        |         |      |          |
| IgM                |     |             |         |      |          |
| ≤50 mg/dL          | 26  | 53.8        | 0.0001  | 11.0 | 3.7-32.6 |
| >50 mg/dL          | 80  | 86.6        |         |      |          |
| PET2-status        |     |             |         |      |          |
| Negative           | 92  | 86.3        | 0.0001  | 193  | 40-922   |
| Positive           | 14  | 28.6        |         |      |          |

Supplementary Figure 1

Training set (N=106)

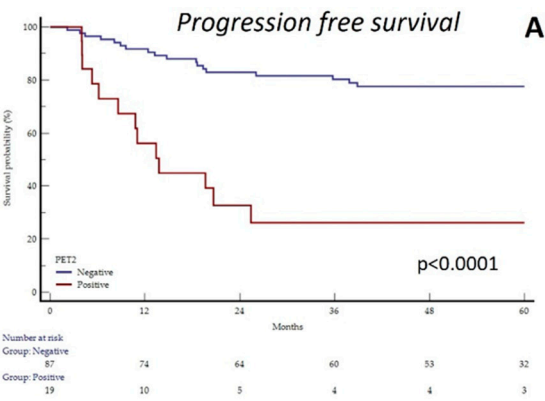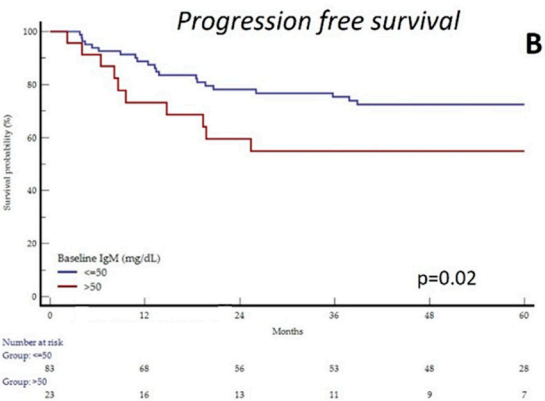

Validation set (N=106)

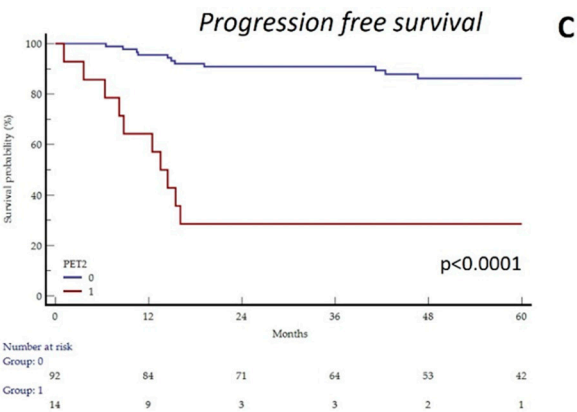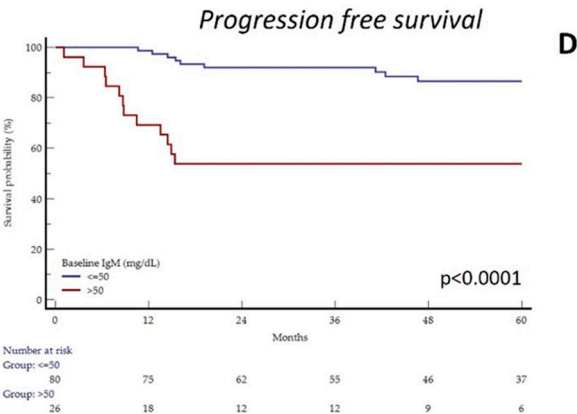

Supplement: s1 [file s1]
